# Supplementary material
Source: PubMed Central journal article supplement (PMC2799156)

**A**

```

RFX6  LQWLEDNYIVCEGVCLPRCILYAHYLDFCRKEK-LEPACAATFGGKTIRQKFPLLTTRRRLGTRGHSKYHYYGGIGIKESSAAYHSVYSGKGLTR
RFX4  LQWLEENYEIAEGVCIPRSALYMHYLDFCEKND-TQPVNAASFGGKIRRQFPLQLTTRRRLGTRGQSKYHYYGIAVKESSQYYDVMYSKKGAAAW
RFX3  LQWLLDNYETAEGVSLPRSTLYNHYLRHQCQEHK-LDRFX5FGGKLIRSIFMGLRTRRRLGTRGNSKYHYYGIRVKPDSPLNRLQEDMQYMAM
RFX2  LQWLLDNYETAEGVSLPRSSLYNHYLRHQCQEHK-LEPVNAASFGGKLIRSVFMGLRTRRRLGTRGNSKYHYYGIRLKPDSPLNRLQEDTQYMAM
RFX1  VQWLLDNYETAEGVSLPRSTLYCHYLLHCQEQK-LEPVNAASFGGKLIRSVFMGLRTRRRLGTRGNSKYHYYGLRIKASSPLLRLMEDQQHMAM
RFX5  YRWIRNHLEEHMDTCLPKQSVYDARKYCESLACCRPLSTANFGGKIREIFPDIKARRLGGRQSKYCYSGIRRKTLVSMPPLPGLDLKGSE
RFX7  FSWIRNTLEEHPETSLPKQEVYDEYKSYCDNLG-YHLPLSAADFGGKIMKNVFPNMKARRRLGTRGKSKYCYSGLRKKAFVHMPTLPNLDFHKTG

```

**B**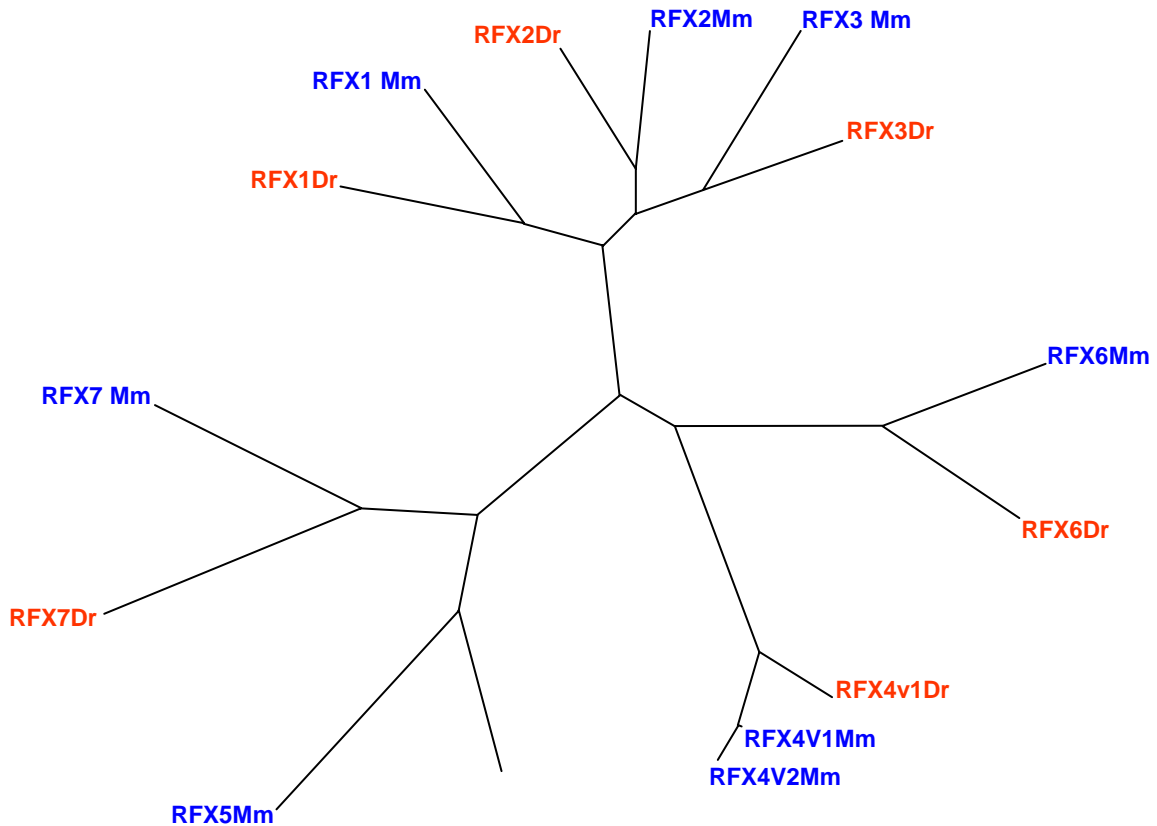

Supplement: supp_137.2.203_041673-FigS1.pdf [file supp_137.2.203_041673-FigS1.pdf]
