# Supplementary material
Source: PubMed Central journal article supplement (PMC2799156)
Supplement: supp_137.2.203_DEV041673TableS1.pdf [file supp_137.2.203_DEV041673TableS1.pdf]

**Table S1. Transcription factors or transcriptional regulators upregulated in Ngn3-positive islet progenitor cells**

| AffyID       | Gene symbol                | Gene title                                                                                                            | FC     | FDR   |
|--------------|----------------------------|-----------------------------------------------------------------------------------------------------------------------|--------|-------|
| 1436092_at   | <i>Mafa</i>                | Transcribed locus, moderately similar to XP_574723.1 PREDICTED:<br>similar to LRRGT00097 ( <i>Rattus norvegicus</i> ) | 386.55 | 0.007 |
| 1419271_at   | <i>Pax6</i>                | paired box gene 6                                                                                                     | 275.2  | 0.008 |
| 1426413_at   | <i>Neurod1</i>             | neurogenic differentiation 1                                                                                          | 171.99 | 0.011 |
| 1425886_at   | <i>Fev</i>                 | FEV (ETS oncogene family)                                                                                             | 139.22 | 0.011 |
| 1455123_at   | <i>St18</i>                | suppression of tumorigenicity 18                                                                                      | 130.74 | 0.009 |
| 1450042_at   | <i>Arx</i>                 | aristaless related homeobox gene (Drosophila)                                                                         | 119    | 0.011 |
| 1451598_at   | <i>Pax4</i>                | paired box gene 4                                                                                                     | 87.63  | 0.011 |
| 1419185_a_at | <i>Mlxipl</i>              | MLX interacting protein-like                                                                                          | 75.37  | 0.012 |
| 1457613_at   | <i>Rfxdc1/Rfx6</i>         | regulatory factor X domain containing 1                                                                               | 65.73  | 0.011 |
| 1421399_at   | <i>Insm1</i>               | insulinoma-associated 1                                                                                               | 61.65  | 0.010 |
| 1422773_at   | <i>Myt1</i>                | myelin transcription factor 1                                                                                         | 53.62  | 0.010 |
| 1422165_at   | <i>Pou3f4</i>              | POU domain, class 3, transcription factor 4                                                                           | 52.83  | 0.012 |
| 1418176_at   | <i>Vdr</i>                 | vitamin D receptor                                                                                                    | 51.53  | 0.012 |
| 1447174_at   | <i>Dach1</i>               | Dachshund 1 (Drosophila)                                                                                              | 49.16  | 0.029 |
| 1450428_at   | <i>Lhx1</i>                | LIM homeobox protein 1                                                                                                | 42.43  | 0.008 |
| 1451716_at   | <i>Mafb</i>                | v-maf musculoaponeurotic fibrosarcoma oncogene family, protein B<br>(avian)                                           | 38.73  | 0.012 |
| 1426298_at   | <i>Irx2</i>                | Iroquois related homeobox 2 (Drosophila)                                                                              | 37.8   | 0.012 |
| 1460299_at   | <i>Hlxb9</i>               | homeobox gene HB9                                                                                                     | 34.41  | 0.012 |
| 1429573_at   | <i>Dmrtc1a</i>             | DMRT-like family C1a                                                                                                  | 30.05  | 0.012 |
| 1436600_at   | <i>Tnrc9</i>               | trinucleotide repeat containing 9                                                                                     | 29.82  | 0.012 |
| 1432034_at   | <i>Neurog3</i>             | neurogenin 3                                                                                                          | 28.41  | 0.012 |
| 1422720_at   | <i>Isl1</i>                | ISL1 transcription factor, LIM/homeodomain                                                                            | 28.26  | 0.022 |
| 1425828_at   | <i>Nkx6.1</i>              | NK6 transcription factor related, locus 1 (Drosophila)                                                                | 24.18  | 0.036 |
| 1421112_at   | <i>Nkx2.2</i>              | NK2 transcription factor related, locus 2 (Drosophila)                                                                | 23.87  | 0.013 |
| 1449967_at   | <i>Sim1</i>                | single-minded homolog 1 (Drosophila)                                                                                  | 15.11  | 0.020 |
| 1422174_at   | <i>lpf1</i>                | insulin promoter factor 1, homeodomain transcription factor                                                           | 12.36  | 0.032 |
| 1419224_at   | <i>Cecr6</i>               | cat eye syndrome chromosome region, candidate 6 homolog<br>(human)                                                    | 11.22  | 0.023 |
| 1440439_at   | <i>AI591476</i>            | Expressed sequence AI591476                                                                                           | 10.99  | 0.039 |
| 1441484_at   | <i>Tcf2</i>                | Transcription factor 2                                                                                                | 10.75  | 0.043 |
| 1448272_at   | <i>Btg2</i>                | B-cell translocation gene 2, anti-proliferative                                                                       | 10     | 0.030 |
| 1429269_at   | <i>BC068157</i>            | cDNA sequence BC068157                                                                                                | 9.46   | 0.041 |
| 1440870_at   | <i>Prdm16</i>              | PR domain containing 16                                                                                               | 7.23   | 0.045 |
| 1448928_at   | <i>Hdac6 III LOC669168</i> | histone deacetylase 6 III similar to Histone deacetylase 6 (HD6)<br>(Histone deacetylase mHDA2)                       | 6.89   | 0.043 |
| 1430353_at   | <i>Glis3</i>               | GLIS family zinc finger 3                                                                                             | 6.88   | 0.045 |
| 1436483_at   | <i>Myt1l</i>               | myelin transcription factor 1-like                                                                                    | 6.54   | 0.029 |
| 1433894_at   | <i>AI591476</i>            | expressed sequence AI591476                                                                                           | 6.53   | 0.047 |
| 1418582_at   | <i>Cbfa2t3h</i>            | core-binding factor, runt domain, alpha subunit 2, translocated to, 3<br>homolog (human)                              | 6.45   | 0.020 |
| 1429633_at   | <i>Lcor</i>                | ligand dependent nuclear receptor corepressor                                                                         | 6.36   | 0.043 |
| 1434777_at   | <i>Mycl1</i>               | v-myc myelocytomatosis viral oncogene homolog 1, lung carcinoma<br>derived (avian)                                    | 5.92   | 0.036 |
| 1437894_at   | <i>Prox1</i>               | prospero-related homeobox 1                                                                                           | 5.84   | 0.042 |
| 1456824_at   | <i>Zfp612</i>              | zinc finger protein 612                                                                                               | 5.52   | 0.047 |
| 1416983_s_at | <i>Foxo1</i>               | forkhead box O1                                                                                                       | 5.19   | 0.032 |
| 1456021_at   | <i>Atf6</i>                | activating transcription factor 6                                                                                     | 4.74   | 0.045 |
| 1450684_at   | <i>Etv1</i>                | ets variant gene 1                                                                                                    | 4.49   | 0.023 |
| 1435236_at   | <i>A630018P17Rik</i>       | RIKEN cDNA A630018P17 gene                                                                                            | 4.23   | 0.017 |
| 1455944_at   | <i>Zfp516</i>              | zinc finger protein 516                                                                                               | 3.33   | 0.048 |
| 1425484_at   | <i>Tox</i>                 | thymocyte selection-associated HMG box gene                                                                           | 2.57   | 0.044 |

Comparison of gene expression profiles in Ngn3-positive versus Ngn3-negative cells (E15.5 pancreas). Probe sets found upregulated in Ngn3-positive cells with an FDR>5% were selected and transcriptional regulators were identified using GO annotations (biological process and molecular function) containing transcription. Results are sorted by fold-change (FC). *Mafa* and *Insm1* were hand-annotated as transcription factors. Excluded transcriptional regulators (FDR>5% and <10%) include: *Atf6*, *Rfx3*, *Dach2*, *Zfp568*, *Hhex*, *Zfp354b*, *Tshz1*.
