# Supplementary material
Source: PubMed Central journal article supplement (PMC2799156)

RFX6 Ki-67

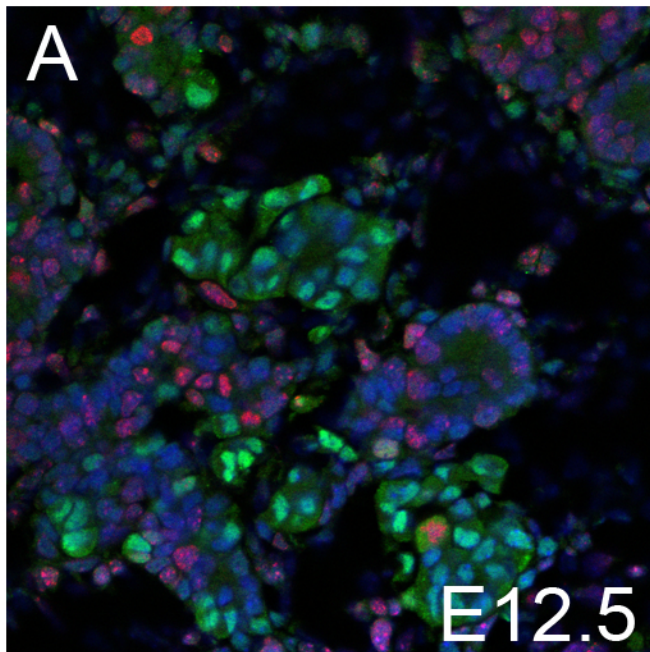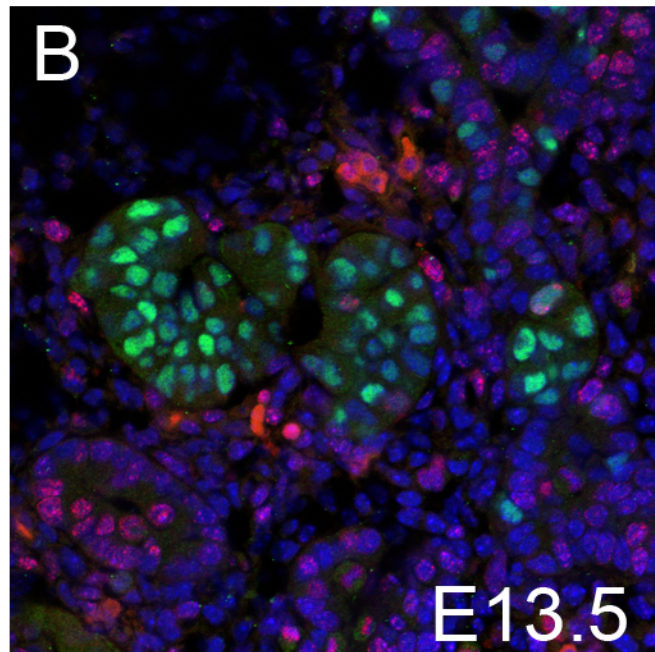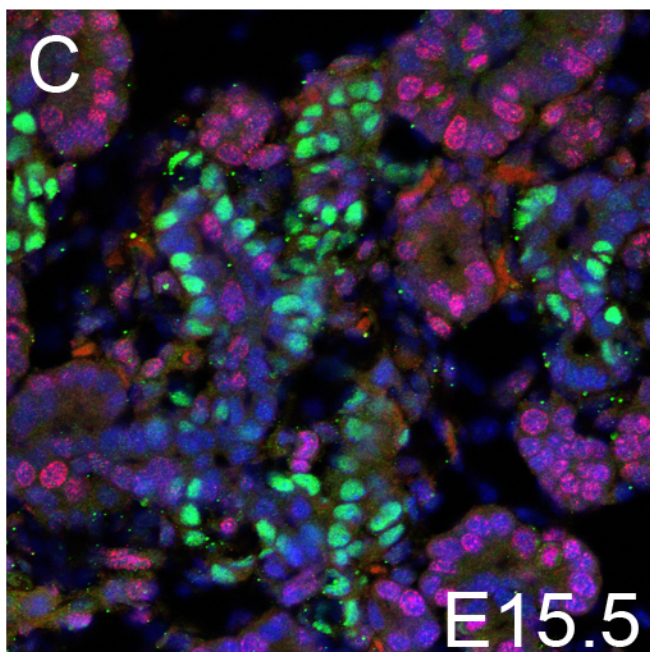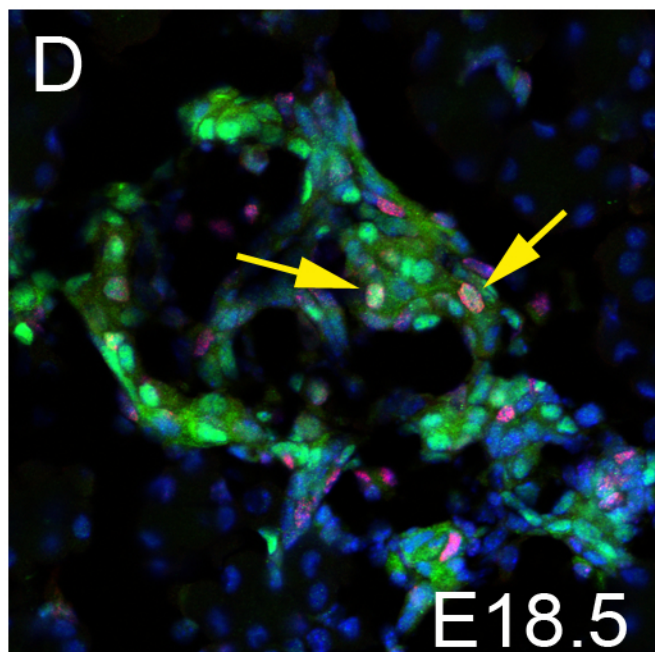

Supplement: supp_137.2.203_041673-FigS2.pdf [file supp_137.2.203_041673-FigS2.pdf]

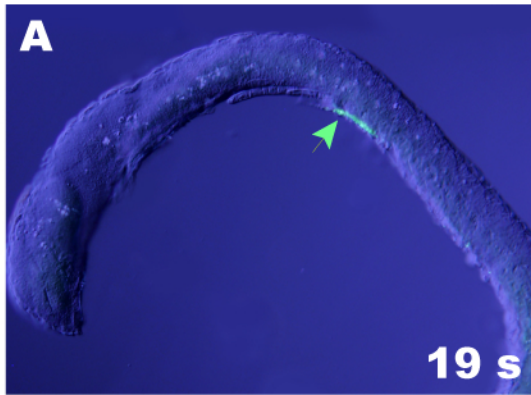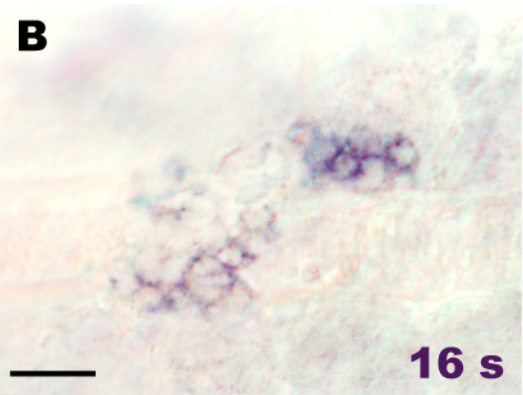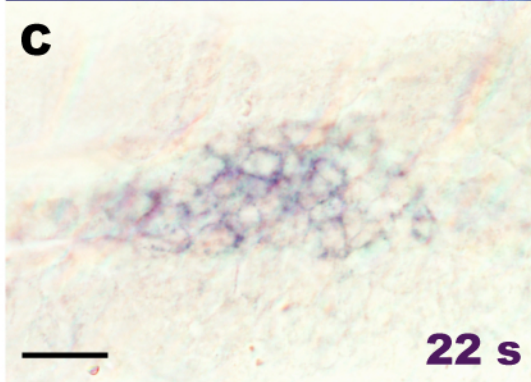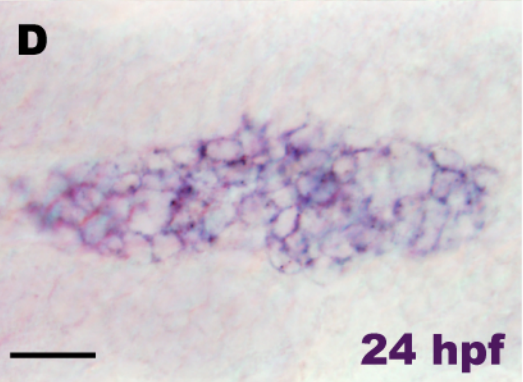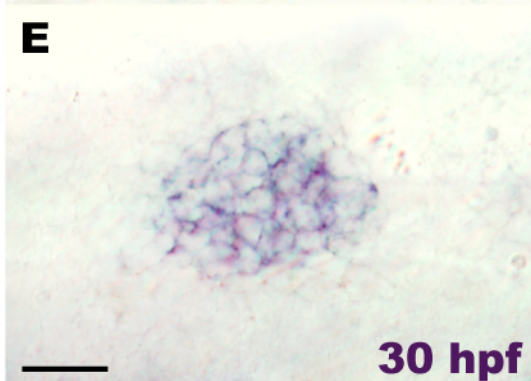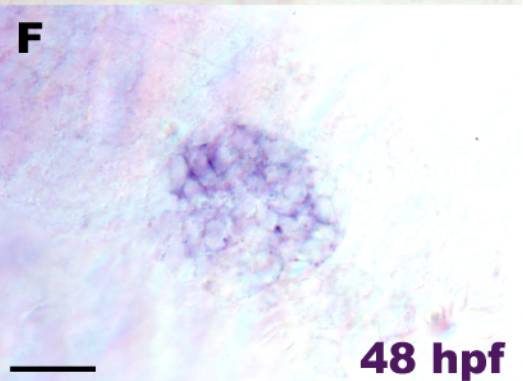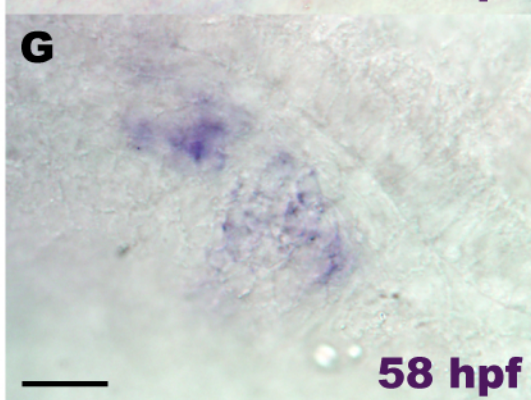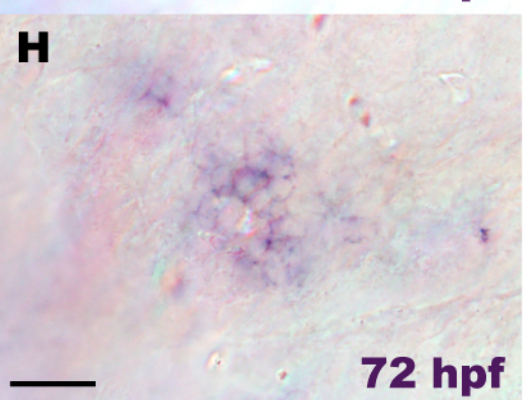

Supplement: supp_137.2.203_041673-FigS3.pdf [file supp_137.2.203_041673-FigS3.pdf]

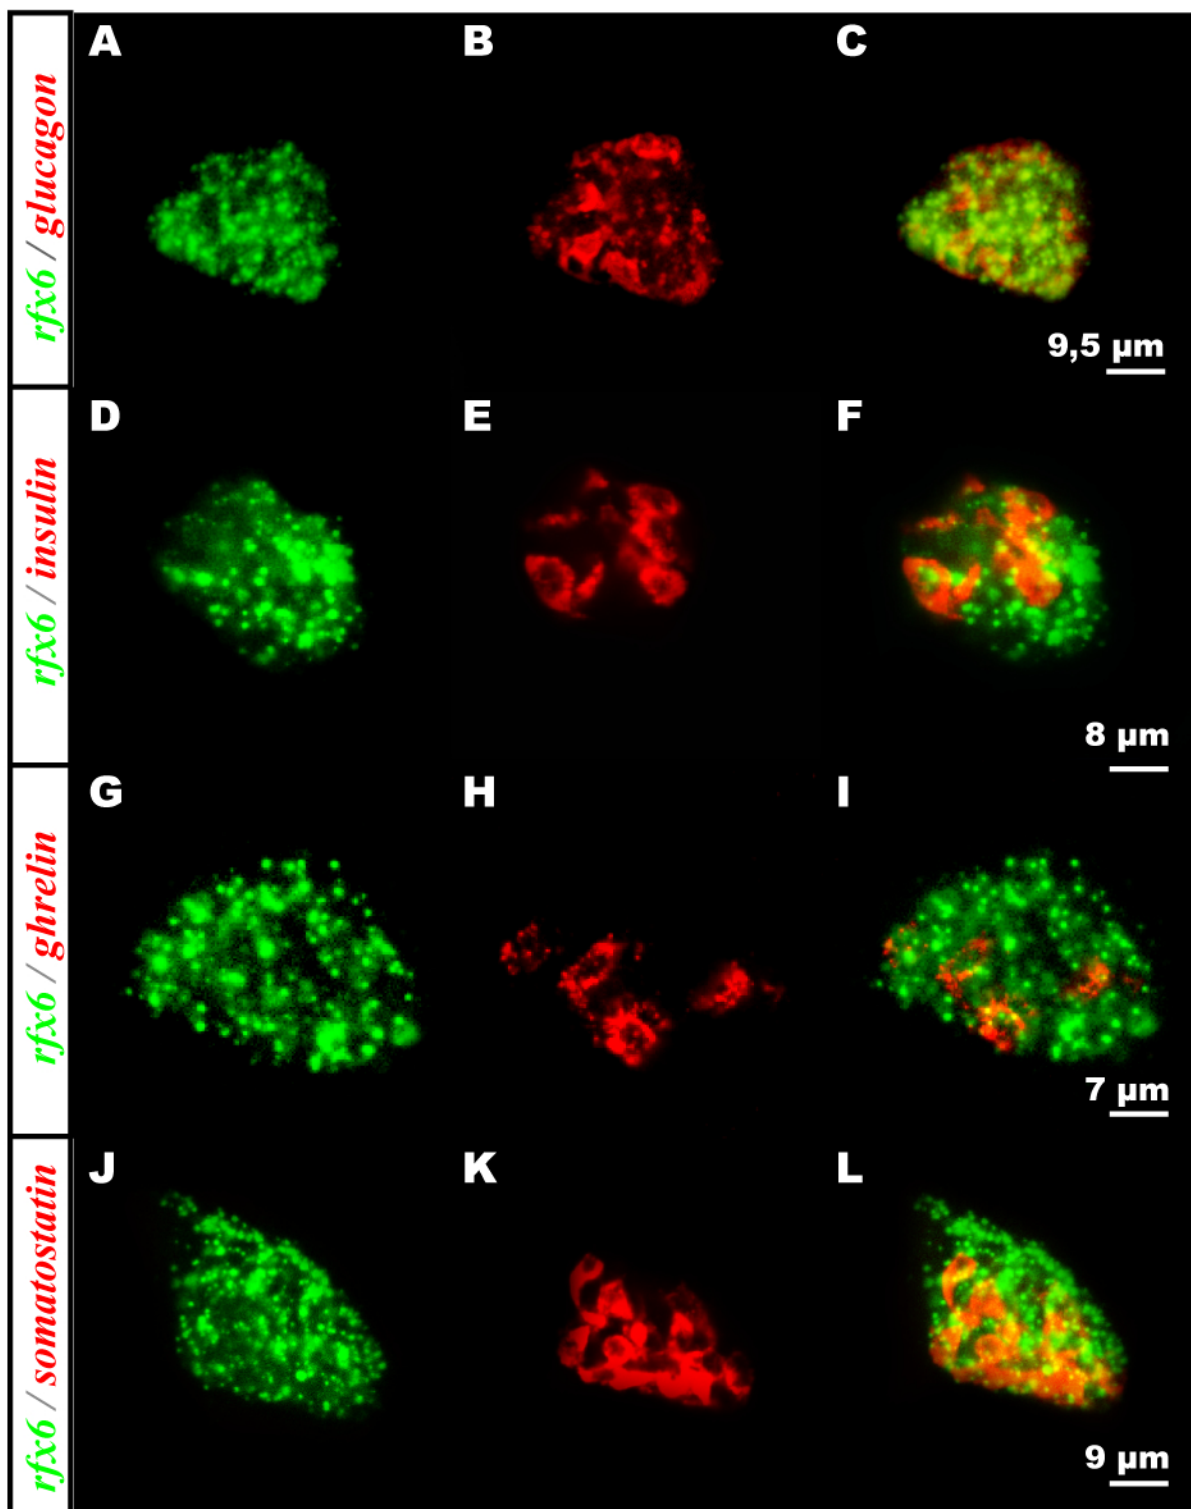

Supplement: supp_137.2.203_041673-FigS4.pdf [file supp_137.2.203_041673-FigS4.pdf]

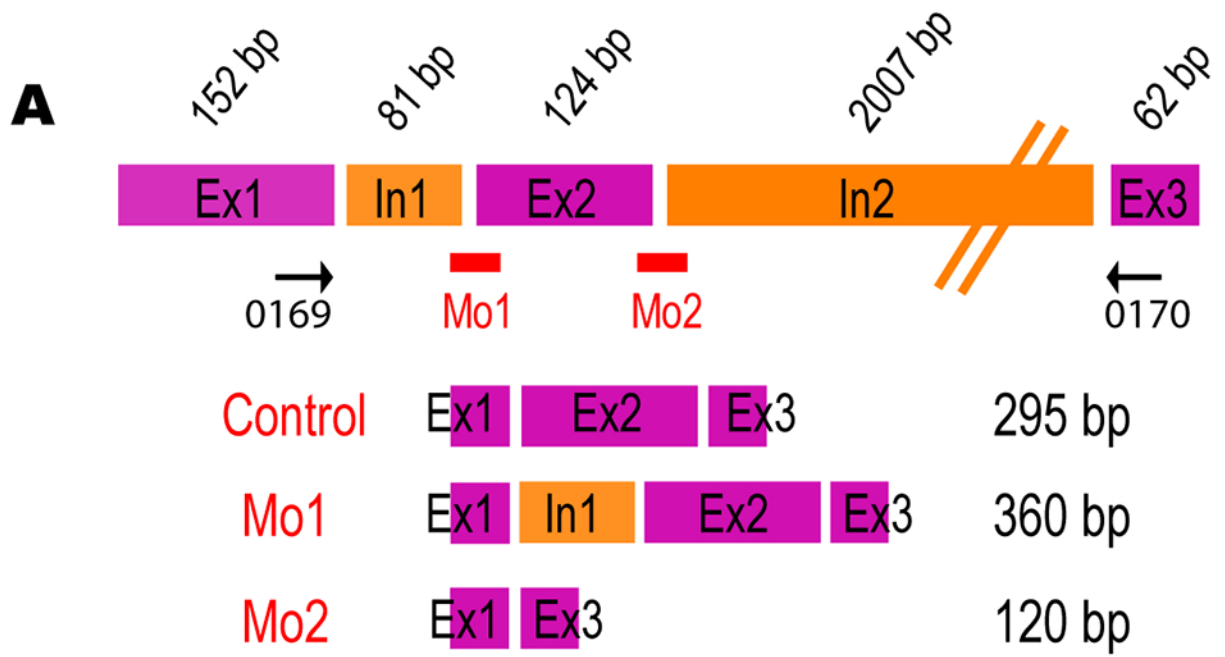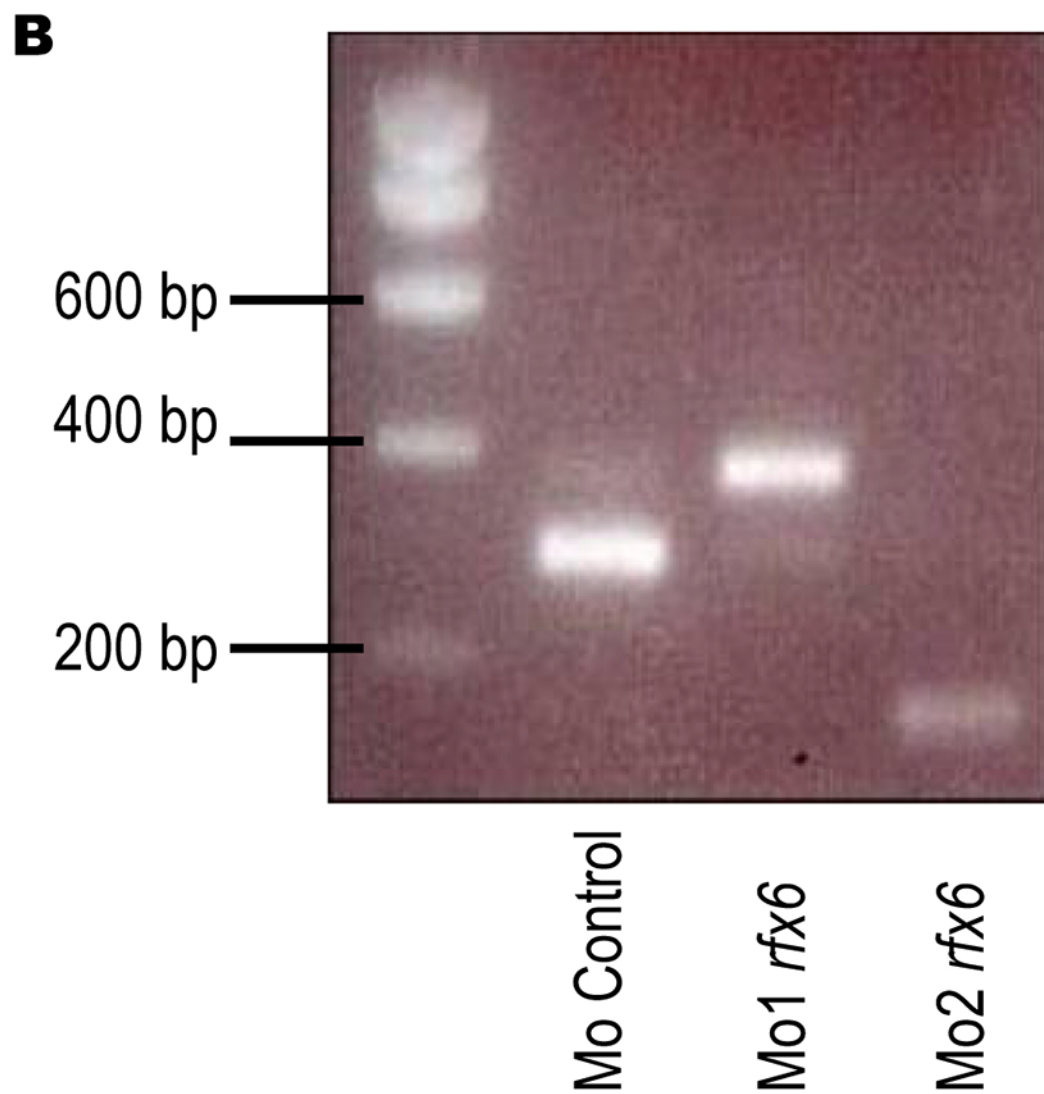

Supplement: supp_137.2.203_041673-FigS5.pdf [file supp_137.2.203_041673-FigS5.pdf]

control

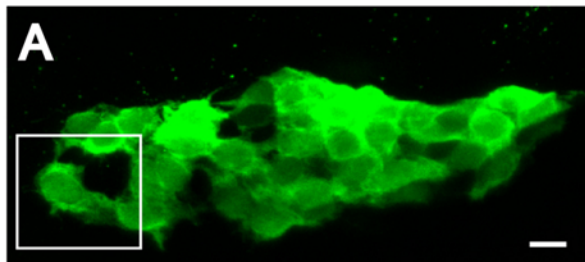

*rfx6* Mo2

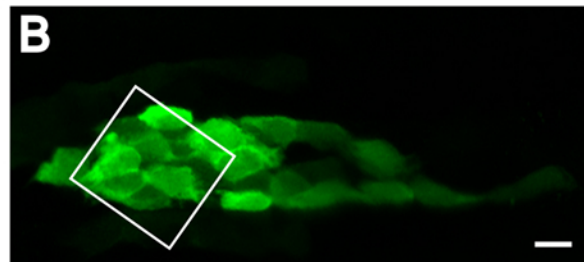

GFP

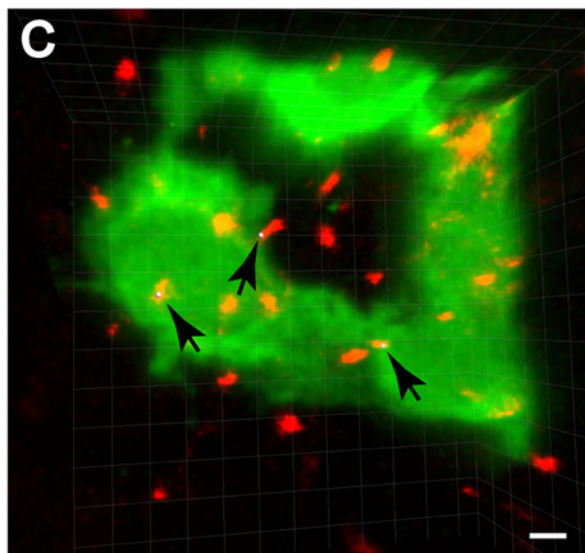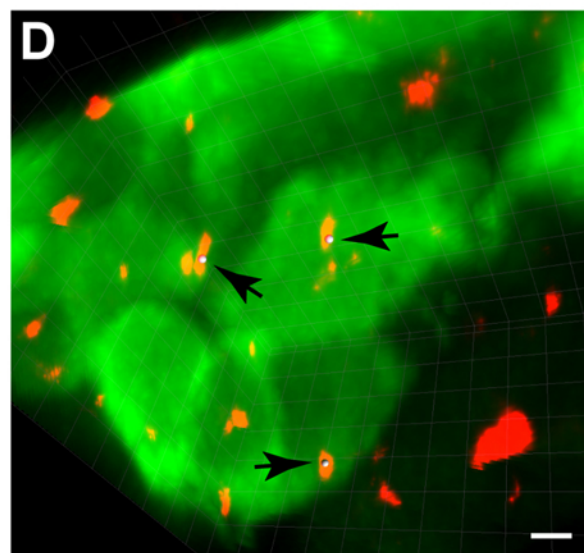

Acetylated tubulin

GFP

Supplement: supp_137.2.203_041673-FigS6.pdf [file supp_137.2.203_041673-FigS6.pdf]
